# Supplementary material for: Enhanced MODIS-derived ice physical properties within the Common Land Model (CoLM) revealing bare-ice–snow albedo feedback over Greenland
Source: Copernicus journal article supplement (doi:10.5194/tc-19-3553-2025), 2025-09-08
Supplement: Supplementary file 1 [file tc-19-3553-2025-supplement.pdf]

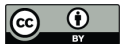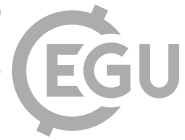

*Supplement of*

## **Enhanced MODIS-derived ice physical properties within the Common Land Model (CoLM) revealing bare-ice–snow albedo feedback over Greenland**

**Shuyang Guo et al.**

*Correspondence to:* Yongjiu Dai ([daiyj6@mail.sysu.edu.cn](mailto:daiyj6@mail.sysu.edu.cn))

The copyright of individual parts of the supplement might differ from the article licence.

For each GrIS bare ice grid cell, we evaluated the correlation, RMSE, and linear trend between MODIS-observed and model-simulated (CoLM-SNICAR-AD/SNICAR-ADv4) albedo time series (21 summer values, 2000-2020). The bottom-right of each panel shows the regional mean (correlation/RMSE/trend). The bottom-right of each panel shows the regional mean (correlation/RMSE/trend).

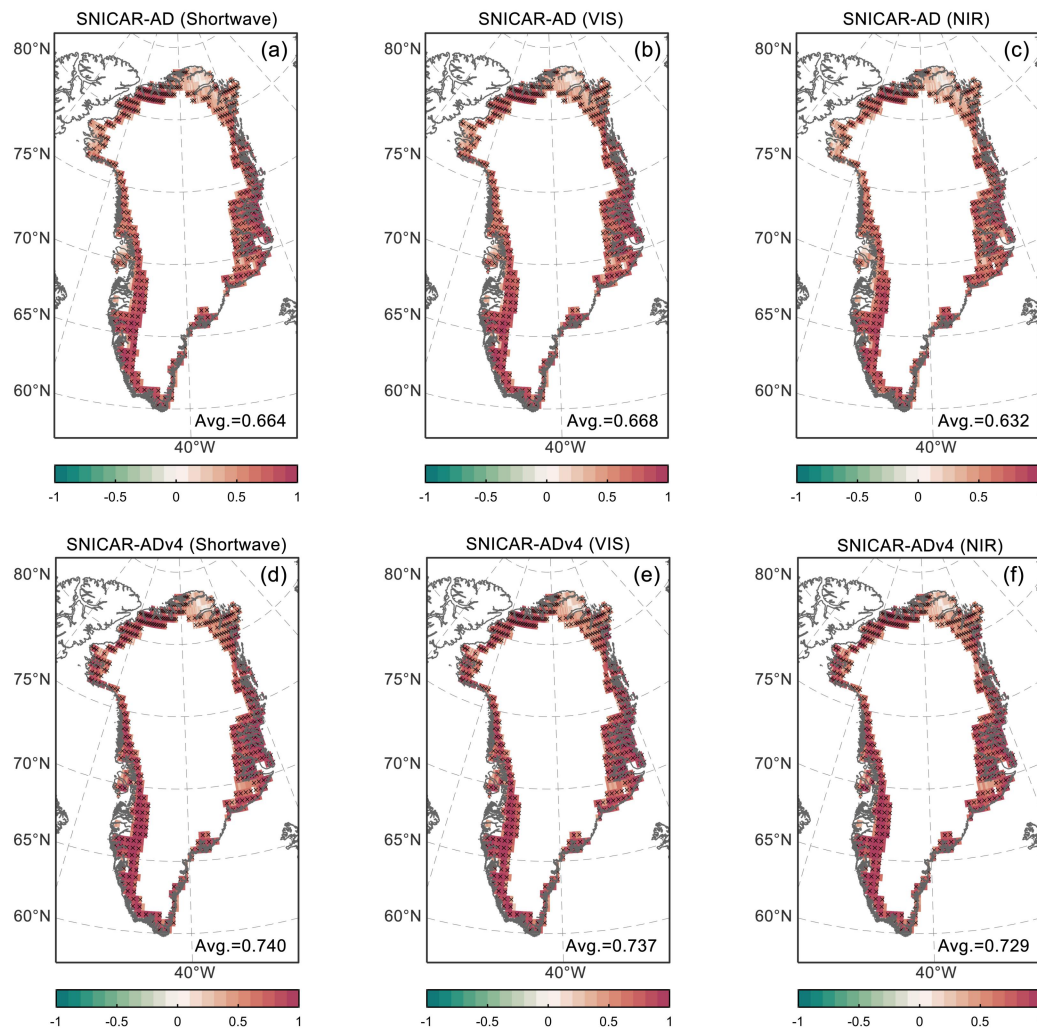

**Figure S1.** Spatial patterns of correlation coefficients between simulated and observed albedo during JJA (2000-2020) for (a-c) CoLM-SNICAR-AD and (d-f) CoLM-SNICAR-ADv4 simulations: (a, d) shortwave (0.3-5.0  $\mu\text{m}$ ), (b, e) visible (0.3-0.7  $\mu\text{m}$ ), and (c, f) near-infrared (0.7-5.0  $\mu\text{m}$ ) bands. Crosses indicate correlations significant at the 95% confidence level ( $p < 0.05$ ).

The RMSE for each cell is calculated as:

$$RMSE = \sqrt{\frac{1}{n} \sum_{i=1}^n (\alpha_{MODIS,i} - \alpha_{model,i})^2}$$

where  $n=21$  (years),  $\alpha_{modis,i}$  and  $\alpha_{model,i}$  are the MODIS and modeled albedo values for year  $i$ , respectively.

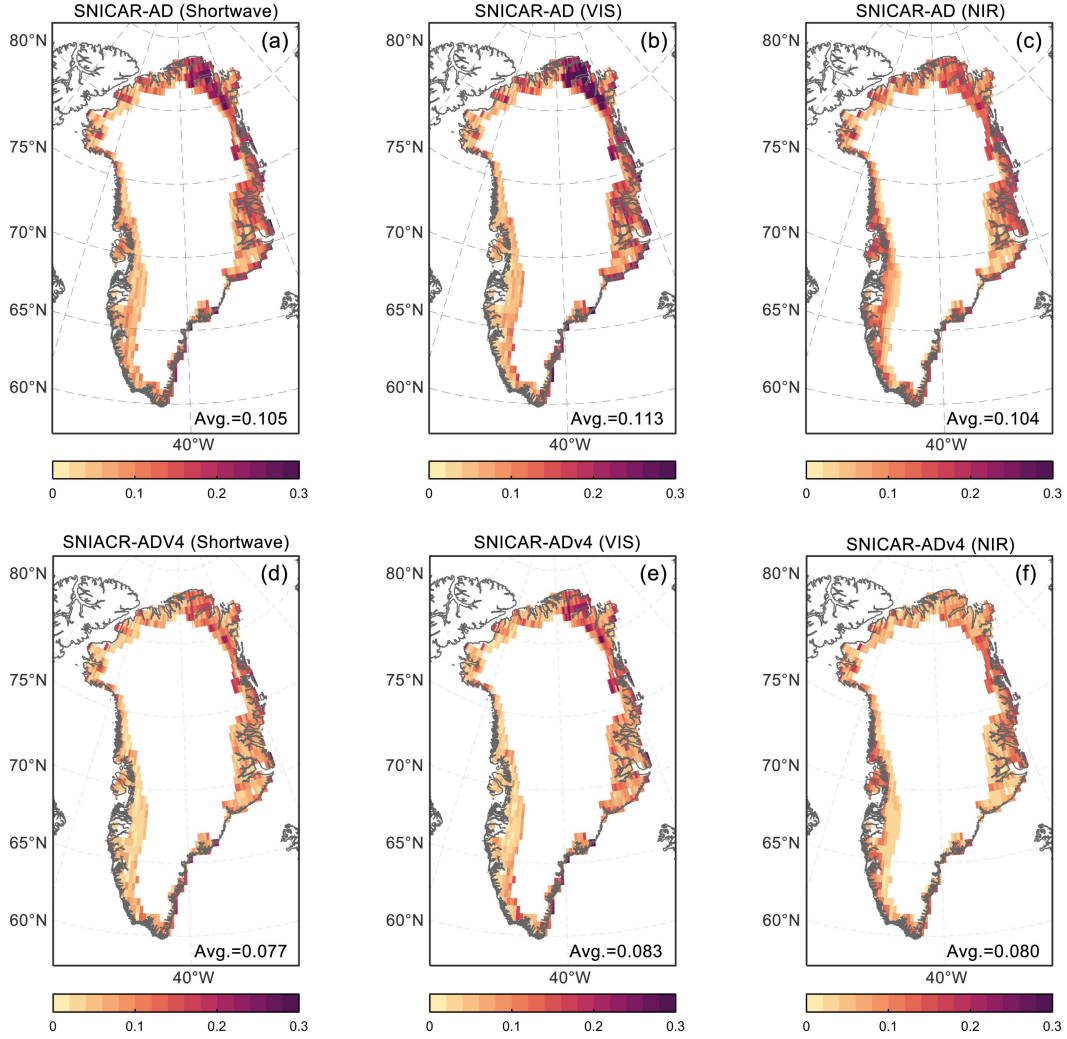

**Figure S2.** Spatial patterns of root-mean-square error (RMSE) between simulated and observed albedo during JJA (2000–2020) for (a–c) CoLM-SNICAR-AD and (d–f) CoLM-SNICAR-ADv4 simulations: (a, d) shortwave (0.3–5.0  $\mu\text{m}$ ), (b, e) visible (0.3–0.7  $\mu\text{m}$ ), and (c, f) near-infrared (0.7–5.0  $\mu\text{m}$ ) bands.

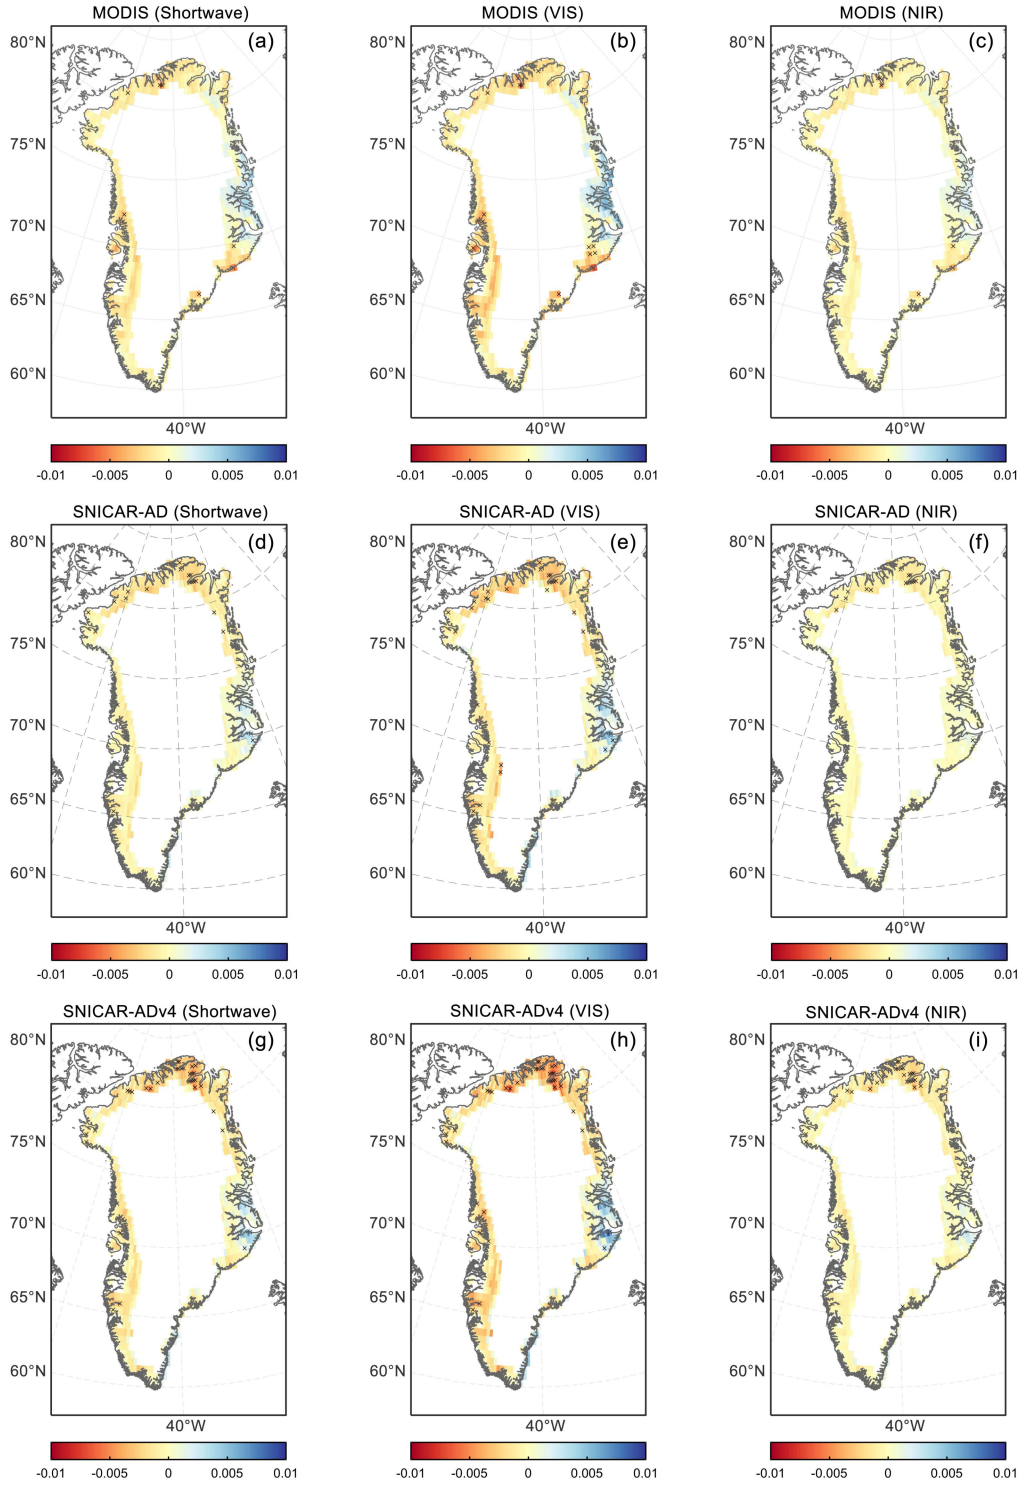

**Figure S3.** Spatial patterns of linear trends (units:  $\text{yr}^{-1}$ ) in albedo during JJA (2000–2020) for (a, d, g) shortwave ( $0.3\text{--}5.0\ \mu\text{m}$ ), (b, e, h) visible ( $0.3\text{--}0.7\ \mu\text{m}$ ), and (c, f, i) near-infrared ( $0.7\text{--}5.0\ \mu\text{m}$ ) bands: (a–c) MCD43C4 observations, (d–f) CoLM-SNICAR-AD and (g–i) CoLM-SNICAR-ADv4 simulations. Crosses denote trends significant at the 95% confidence level ( $p < 0.05$ ).
